# Supplementary material
Source: Springer Nature journal article supplement (https://www.springermedizin.de/resource/supplementary/12885_2008_1522_MOESM6_ESM.pdf/9472228)

A

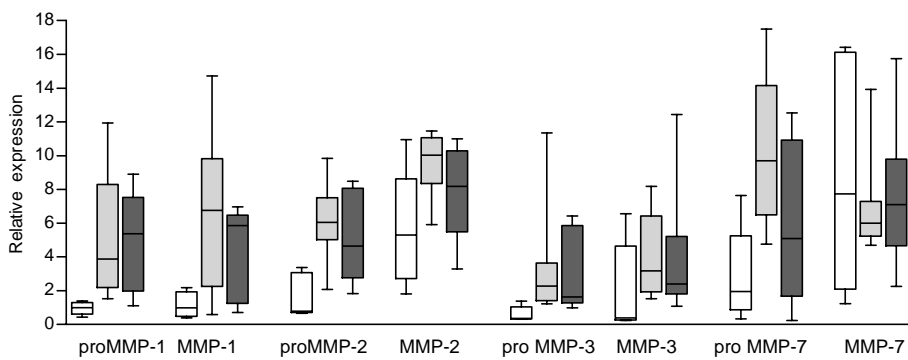

B

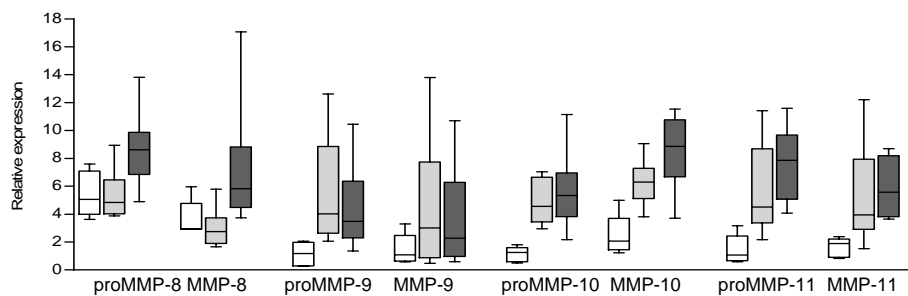

C

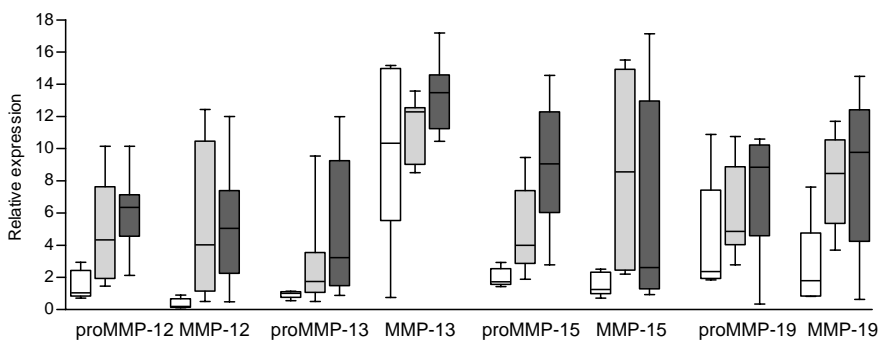

D

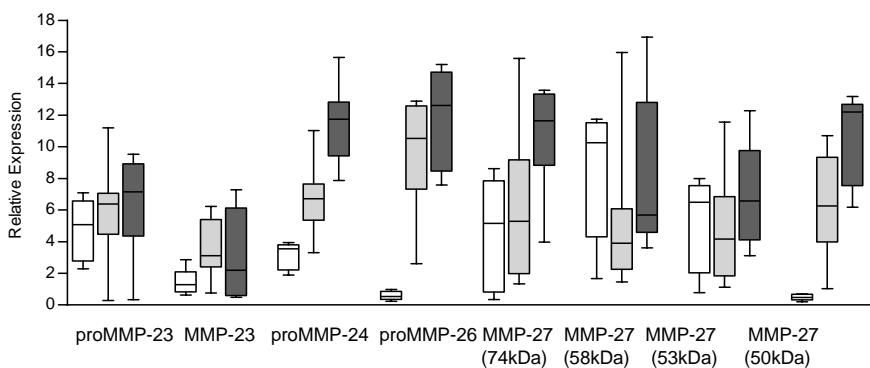

E

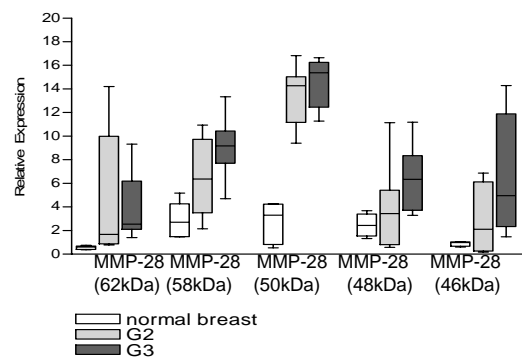

Supplement: MOESM6 [file 9472228]
